# Supplementary material
Source: publisher figshare collection journal article supplement (https://geolsoc.figshare.com/ndownloader/files/14340386)
Supplement: Supplementary file 1 [file 14340386]

## Sheet: Sheet1
Table S5 mudrock ICP-MS, Maitai Group, Ch 11
Sample		NZ13-321	N13 89	NZ13-209	NZ13-211	NZ13-212	NZ13-213	N13 214	NZ13-220	N17-228	N17-231
GPS		S41 38655 E173 16868	S45 65559 E168 22954	S45 38075 E168 06860	S45 73222 E168 06637	S45 73222 E168 06638	S45 73222 E168 06639	S45 37061 E168 06922	S45 37437 E168 08188	59G 80187 UTM54 12420	59G 76568 UTM54 11059
Setting/lithology		Roding River	Mossburn quarry	Bare Peak	Bare Peak	Bare Peak	Bare Peak	Bare Peak	Bare Peak	Wairoa River	Lee Valley Reserve
Stratigraphy		Stephens Subgp.	Stephens Subgroup	Stephens Gp.	Stephens Subgp.	Stephens Subgp.	Stephens Subgp.	Stephens Subgp., Cerberus Fm.	Stephens Subgp.	Stephens Subgp.	Stephens Subgp.
Ba		46	441	168	365	298	353	355	103	356	346
Be		<1	<1	5	<1	2	<1	5	2	3	<1
Co		32.6	33.8	28.3	17.6	21.7	23.2	23.8	20.7	22	22.1
Cs		0.3	0.4	1.9	8.1	4.5	4.3	4.9	0.3	4.3	5
Ga		17.6	10.5	21.5	23	19.9	22.5	22.4	17.6	23.3	18.5
Hf		3.2	3.3	5.2	4.7	4.4	4.7	4.5	4	5.2	4.6
Nb		2.9	4.1	5.8	7.7	6.3	6.2	5.9	5	6.9	6.8
Rb		5.8	23.6	31.3	107.6	68.7	80.7	82.3	8.5	74.3	82.3
Sn		1	<1	2	3	2	2	2	1	2	3
Sr		142.8	315.1	206.6	164.1	159.1	137.4	150.1	91.5	160.5	199.2
Ta		1	1.6	1	1.3	0.9	0.8	0.8	2	0.6	1
Th		4.5	1.4	4	9.7	7.1	6.6	7.2	5	7.6	8.2
U		1.4	0.6	1.1	2.1	1.5	1.7	1.3	1.8	2	1.9
V		275	222	247	145	160	181	203	121	198	212
W		61.7	99.5	51.4	30.4	20	16.2	29.4	141.6	9.4	51.6
Zr		115.9	132.1	182.1	169.5	161.4	152.5	164.3	145.4	196.3	162.4
Y		24.8	21.5	27.5	22.4	22	20.9	24.2	26.8	26.2	27
La		14.7	7	17.9	19.2	17.7	17.7	19.8	14.6	19.4	21.6
Ce		33.5	20	41.4	49.5	41.7	42.3	42.5	32.3	45.2	45.3
Pr		4.1	2.9	5.27	5.02	4.72	4.28	4.52	4	5.1	5.32
Nd		19.5	12.8	23.3	21.7	17.4	16.3	18.5	16.6	20.6	22
Sm		4.45	3.43	5.2	4.31	4.11	3.53	4.31	4.02	4.72	4.85
Eu		1.15	1.1	1.57	1	1.03	1	1.03	0.95	1.21	1.25
Gd		4.49	3.86	5.14	3.92	3.74	3.52	4.16	4.23	4.52	4.71
Tb		0.67	0.64	0.83	0.64	0.68	0.61	0.7	0.65	0.8	0.8
Dy		4.06	3.74	4.78	4.23	3.69	3.79	4.11	3.98	4.85	4.8
Ho		0.9	0.71	0.96	0.79	0.88	0.8	0.86	0.86	1	0.98
Er		2.46	2.03	2.69	2.36	2.55	2.12	2.41	2.57	3.02	2.92
Tm		0.4	0.29	0.42	0.39	0.33	0.33	0.35	0.39	0.47	0.43
Yb		2.74	2.05	2.78	2.78	2.49	2.54	2.46	2.67	3.13	2.77
Lu		0.4	0.32	0.43	0.42	0.38	0.37	0.38	0.4	0.47	0.45
Eu/Eu*		0.786637	0.92434	0.928531	0.743872	0.803268	0.867403	0.743758	0.704401	0.800986	0.799666
LaCN		47.4194	22.5806	57.7419	61.9355	57.0968	57.0968	63.871	47.0968	62.5806	69.6774
YbCN		13.11	9.80861	13.3014	13.3014	11.9139	12.1531	11.7703	12.7751	14.9761	13.2536
LaCN/YbCN		3.61702	2.30212	4.34103	4.6563	4.79246	4.69812	5.42644	3.6866	4.17871	5.25725
CN=chondrite normalised (Boynton, 1984)
